# Supplementary material for: The association between social capital and mental health and behavioural problems in children and adolescents: an integrative systematic review
Source: PubMed Central journal article supplement (PMC4270040; doi:10.1186/2050-7283-2-7), 2014-03-26
Supplement: 40359_2013_9034_MOESM1_ESM.pdf [file 40359_2013_9034_MOESM1_ESM.pdf]

## Additional File 1: Search strategy (PsycINFO<sup>1</sup>)

| Topic                                     | Index terms and keywords                                                                                                                                                                                                                                                                                                                                                                                                                                                                                                                                                                                                                                                                                                                                                                                                                                                                                                                                                                                                                                                                                                                                                                                                                                                                                                                          |
|-------------------------------------------|---------------------------------------------------------------------------------------------------------------------------------------------------------------------------------------------------------------------------------------------------------------------------------------------------------------------------------------------------------------------------------------------------------------------------------------------------------------------------------------------------------------------------------------------------------------------------------------------------------------------------------------------------------------------------------------------------------------------------------------------------------------------------------------------------------------------------------------------------------------------------------------------------------------------------------------------------------------------------------------------------------------------------------------------------------------------------------------------------------------------------------------------------------------------------------------------------------------------------------------------------------------------------------------------------------------------------------------------------|
| <b>Social capital</b>                     | <p>S1 social networks/ OR online social networks/<br/>           S2 social support/<br/>           S3 friendship/<br/>           S4 friend*<br/>           S5 peer relations/ OR peer pressure/<br/>           S6 family relations/ OR child discipline/ OR childrearing practices/ OR family conflict/ OR marital relations/ OR parent child relations/ OR parental role/ OR sibling relations<br/>           S7 intergenerational relations/<br/>           S8 parenting/ OR authoritarian parenting/ OR childrearing practices/ OR parent child communication/ OR parental involvement/ OR parenting style/ OR permissive parenting/<br/>           S9 school environment/<br/>           S10 school*<br/>           S11 community involvement/<br/>           S12 neighborhoods/ OR ghettos/<br/>           S13 social structure/<br/>           S14 social capital/<br/>           S15 social capital<br/>           S16 salutogenesis OR asset* based OR health asset*<br/>           S17 trust (social behaviour)/ OR reciprocity/<br/>           S18 trust OR reciprocity<br/>           S19 social cohesion OR neighbourhood cohesion<br/>           S20 family social capital OR family capital<br/>           S21 community social capital OR community capital<br/>           S22 community processes/<br/>           S23 OR/1-22</p> |
| <b>Psycho-social health and wellbeing</b> | <p>S24 mental health/ OR community mental health/<br/>           S25 emotional intelligence/<br/>           S26 psychological development/<br/>           S27 cognitive development/ OR intellectual development/ OR language development/ OR language delay<br/>           S28 emotional development/<br/>           S29 psychosocial development/ OR childhood play/ OR psychosexual development/<br/>           S30 health behavior/<br/>           S31 well being/<br/>           S32 quality of life/<br/>           S33 emotional adjustment/ OR emotional control/ OR identity crisis/<br/>           S34 public health/<br/>           S35 health promotion/<br/>           S36 behavior problems/<br/>           S37 child psychology/ OR adolescent psychology/<br/>           S38 adolescent development/<br/>           S39 childhood development/ OR early childhood development/ OR proximal development</p>                                                                                                                                                                                                                                                                                                                                                                                                                        |

<sup>1</sup> ). The search strategy was appropriately tailored for the other eight databases searched.

|                                        |                                                                                                                                                                                                                                                                                         |
|----------------------------------------|-----------------------------------------------------------------------------------------------------------------------------------------------------------------------------------------------------------------------------------------------------------------------------------------|
|                                        | S40 OR/24-39                                                                                                                                                                                                                                                                            |
| <b>Combined search</b>                 | S41 S23 AND S40                                                                                                                                                                                                                                                                         |
| <b>Combined search with delimiters</b> | S42 limit S41 as follows:<br>publication year – 1990-2012<br>peer reviewed journal articles<br>English language<br>age groups – neonatal (birth-1 month), infancy (2-23 months), preschool (2-5 years), school age (6-12 years), adolescence (13-17 years)<br>population group – humans |
