# Supplementary material for: The association between social capital and mental health and behavioural problems in children and adolescents: an integrative systematic review
Source: PubMed Central journal article supplement (PMC4270040; doi:10.1186/2050-7283-2-7), 2014-03-26

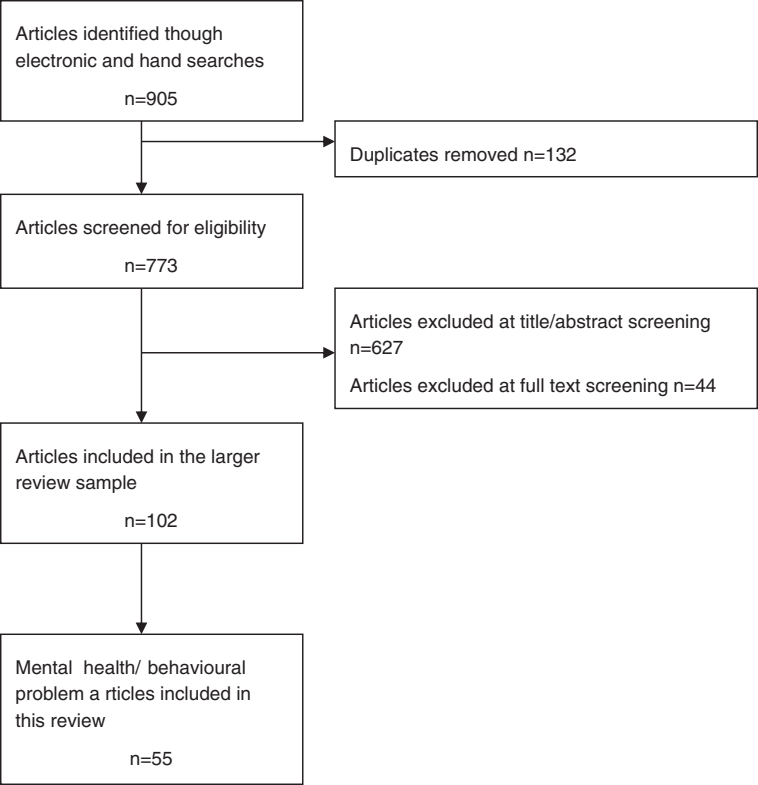

Supplement: 40359_2013_9034_MOESM3_ESM.pdf [file 40359_2013_9034_MOESM3_ESM.pdf]
